# Supplementary material for: Rare variants of the FMN riboswitch class in Clostridium difficile and other bacteria exhibit altered ligand specificity
Source: PubMed Central journal article supplement — RNA. 2019 Jan;25(1):23–34. doi: 10.1261/rna.067975.118 (PMC6298564; doi:10.1261/rna.067975.118), 2019-01
Supplement: supp_067975.118_Supplemental_Data_File.pdf [file supp_067975.118_Supplemental_Data_File.pdf]

```
DLF009_scaffold36204_1/195-304      CGGGAGAAGAAAGCU
UnmappedStool_Broad_scaffold_1132661/973-864  CGGGAGAAGAAAGCU
#=GC SS_cons                          .....))))))..
//
```
